# Supplementary material for: Erlotinib-Loaded Dendrimer Nanocomposites as a Targeted Lung Cancer Chemotherapy
Source: MDPI journal article supplement (doi:10.3390/molecules28093974), 2023-05-08
Supplement: s1 [file s1]

## Supplementary Materials

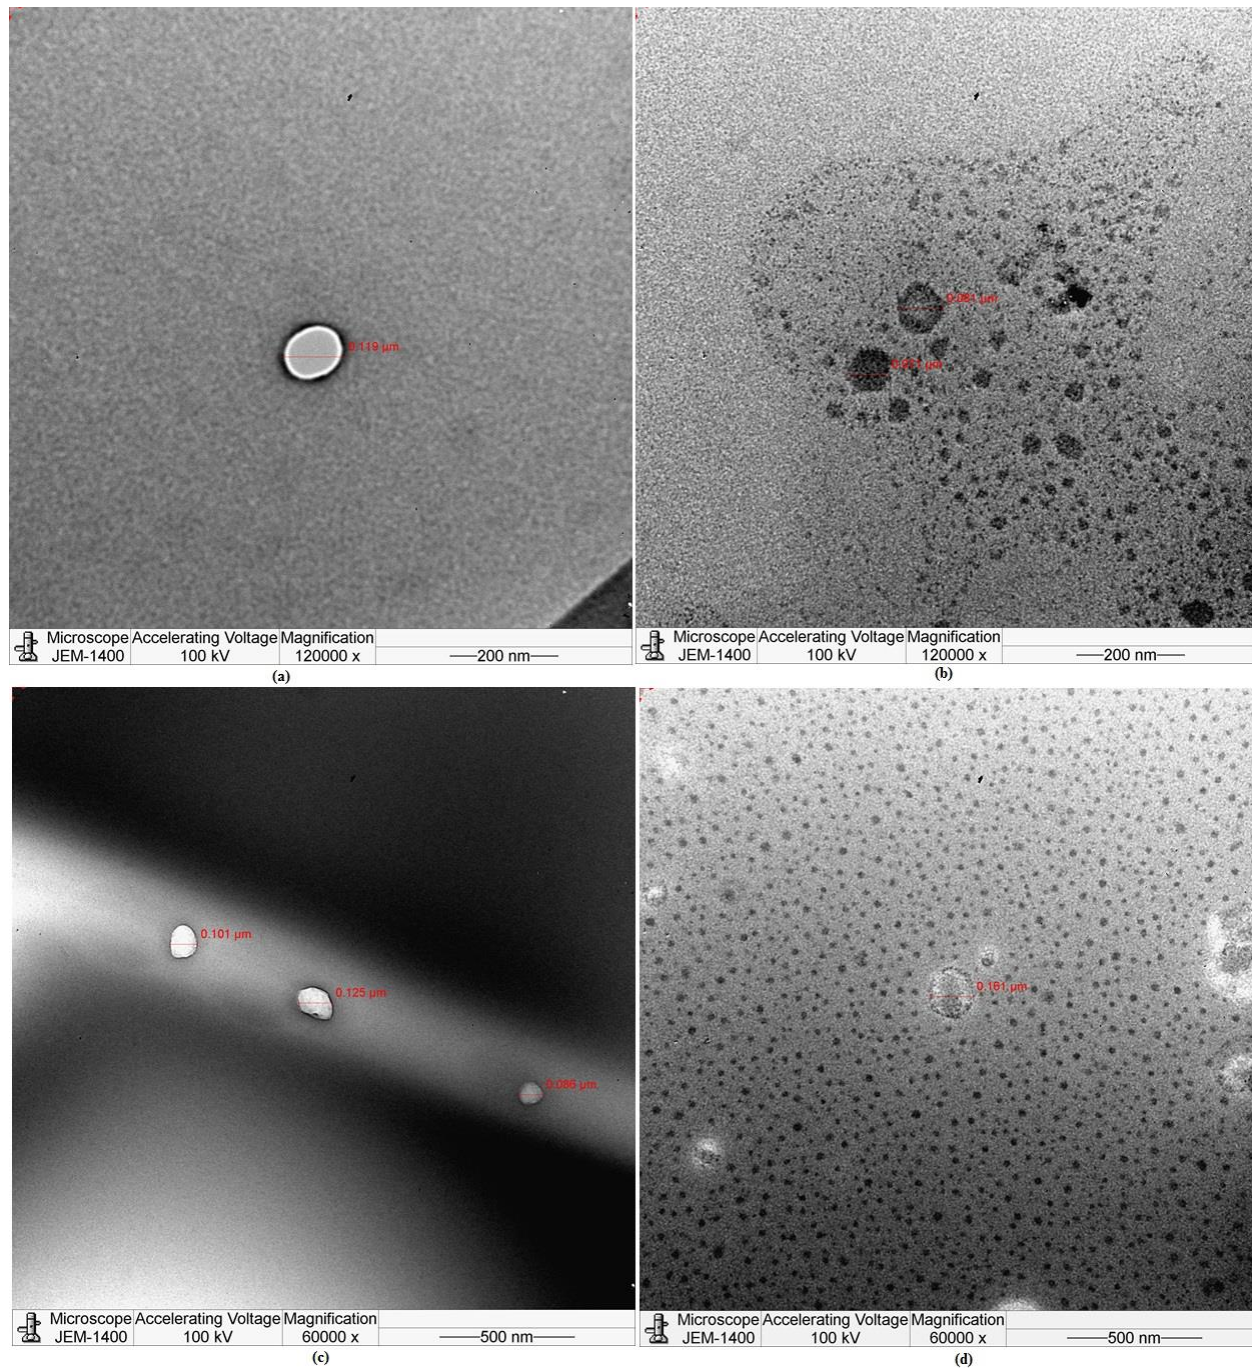

**Figure S1.** TEM images at low magnification to inspect the morphology of (a) blank G4-FITC PAMAM dendrimers; (b) erlotinib conjugated G4-FITC PAMAM dendrimers; (c) blank G5-FITC PAMAM dendrimers; and (d) erlotinib conjugated G5-FITC PAMAM dendrimers.

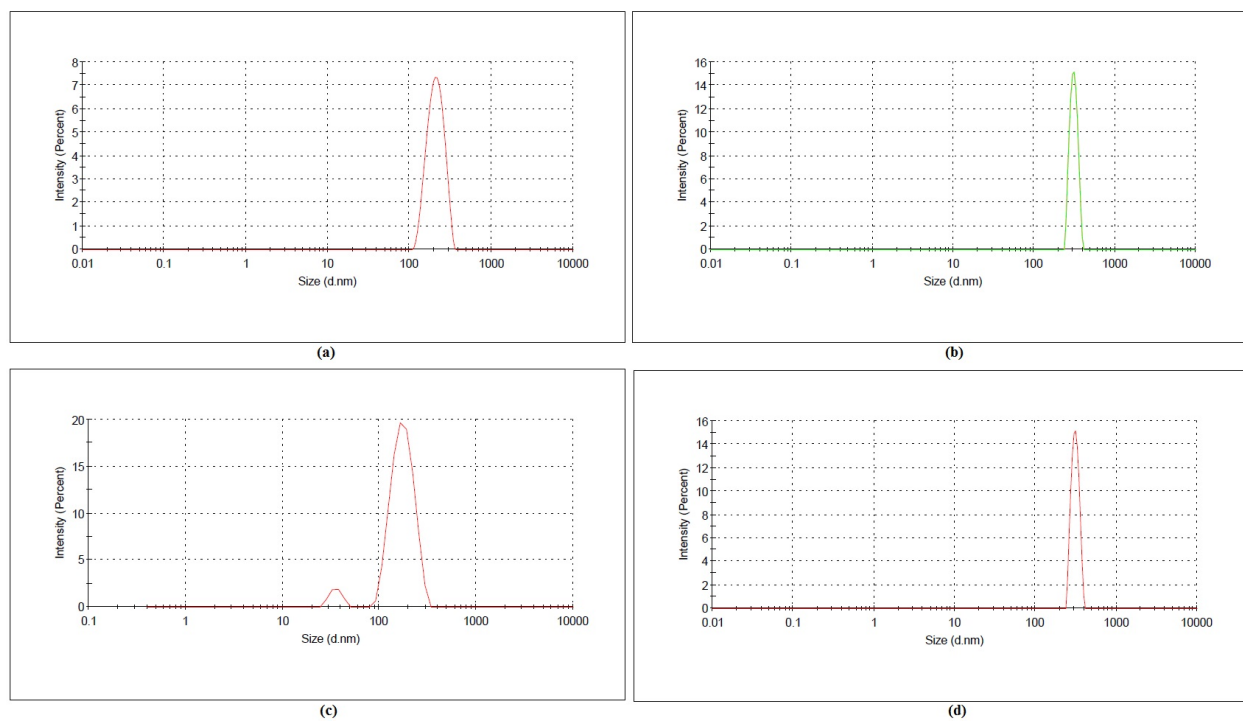

**Figure S2.** Particle size distribution by intensity for (a) blank G4-FITC PAMAM dendrimers; (b) erlotinib conjugated G4-FITC PAMAM dendrimers; (c) blank G5-FITC PAMAM dendrimers; and (d) erlotinib conjugated G5-FITC PAMAM dendrimers.

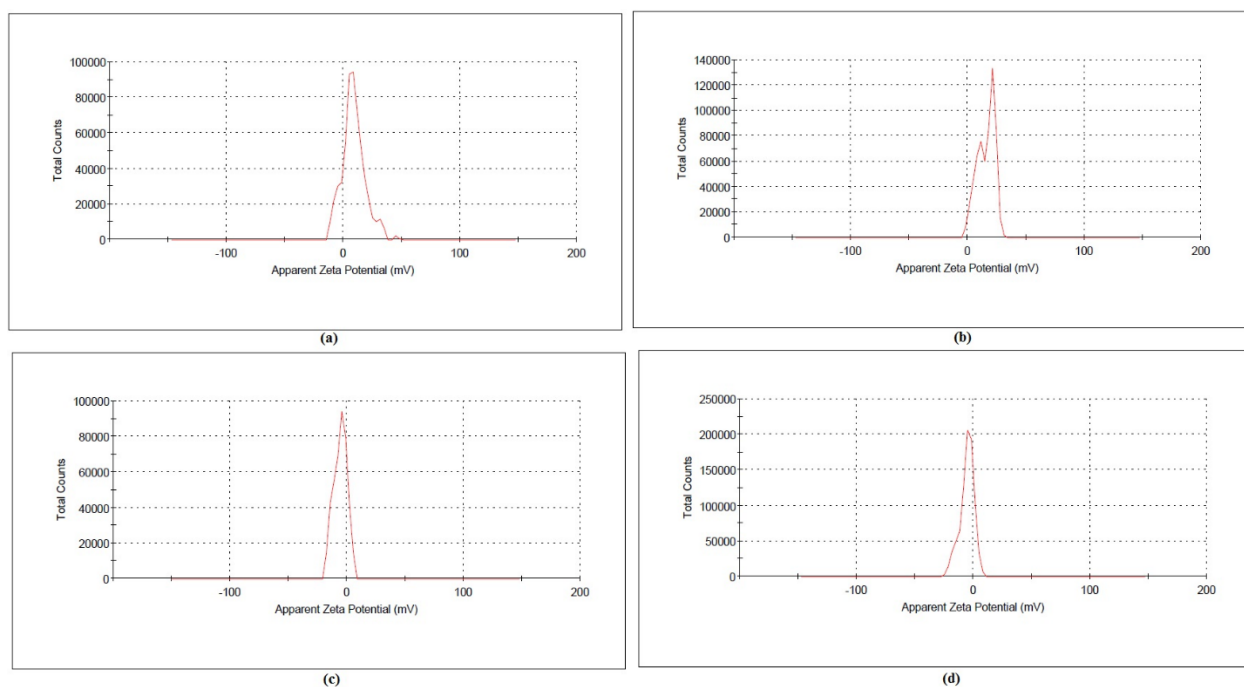

**Figure S3.** Zeta potential measurements for (a) blank G4-FITC PAMAM dendrimers; (b) erlotinib conjugated G4-FITC PAMAM dendrimers; (c) blank G5-FITC PAMAM dendrimers; and (d) erlotinib conjugated G5-FITC PAMAM dendrimers at pH 5.4.

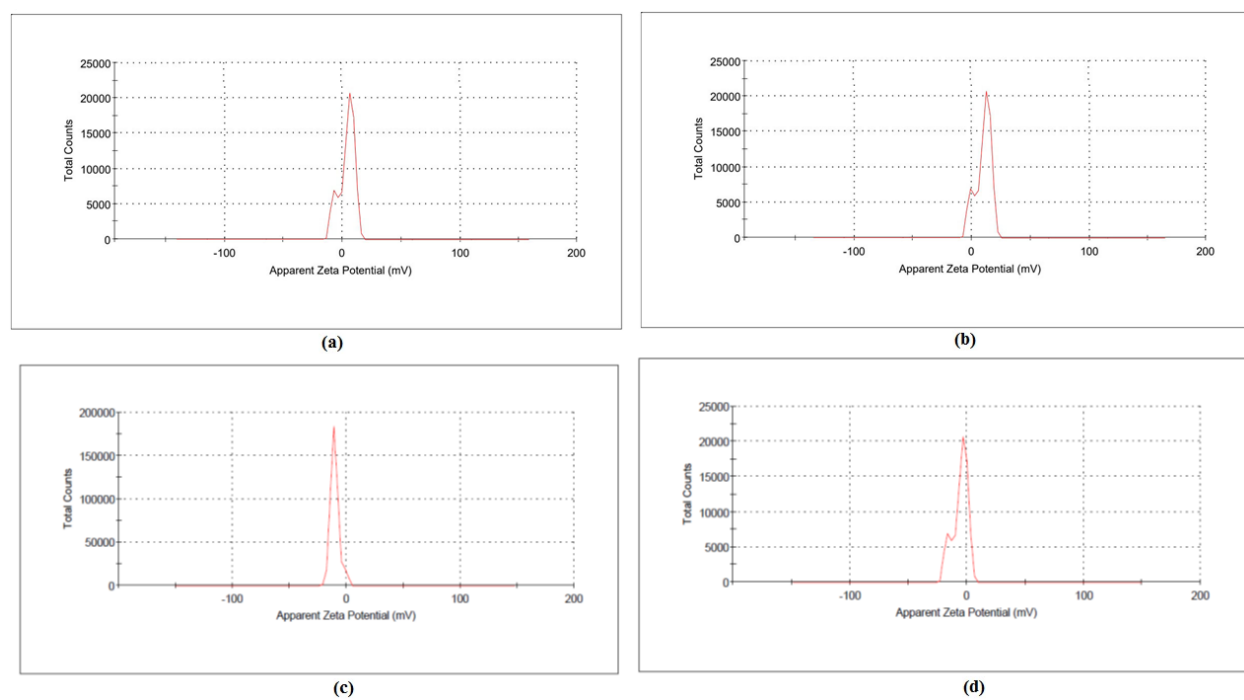

**Figure S4.** Zeta potential measurements for (a) blank G4-FITC PAMAM dendrimers; (b) erlotinib conjugated G4-FITC PAMAM dendrimers; (c) blank G5-FITC PAMAM dendrimers; and (d) erlotinib conjugated G5-FITC PAMAM dendrimers at pH 7.4.

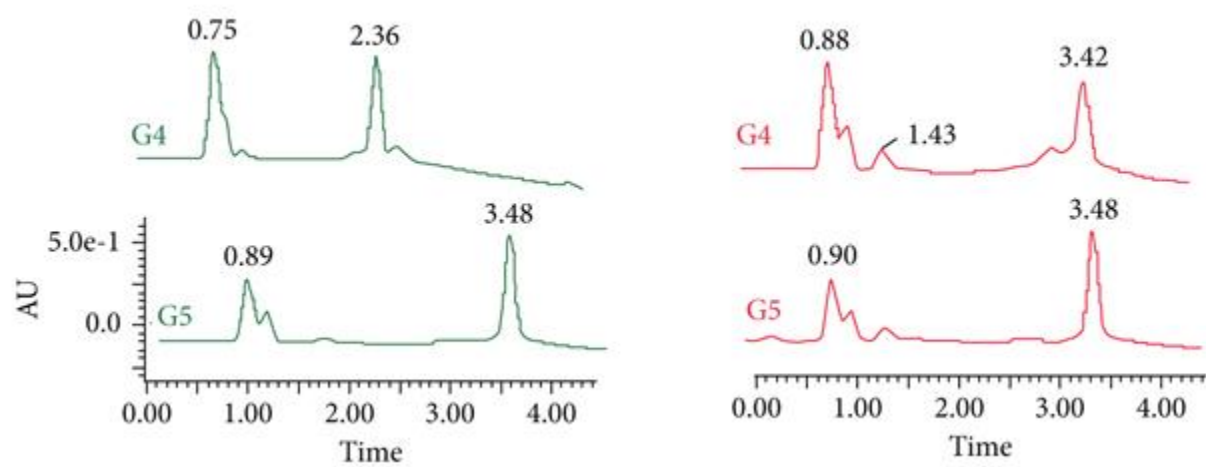

**Figure S5.** HPLC-PDA purity of polyamidoamine (PAMAM) dendrimers G4 and PAMAM dendrimers G5.
